# Supplementary material
Source: PubMed Central journal article supplement (PMC5648060)
Supplement: NIHMS910129-supplement-2.pdf [file NIHMS910129-supplement-2.pdf]

## A Genetically Encoded Cyclobutene Probe for Labelling of Live Cells

### Electronic Supporting Information, Section 2: NMR spectra

#### Model studies of inverse electron-demand Diels-Alder (IEDDA)

8-(2,5-Di(pyridin-2-yl)-3,4-diazabicyclo[4.2.0]octa-1,4-dien-7-yl)octanoic acid and

8-(2,5-di(pyridin-2-yl)-3,4-diazabicyclo[4.2.0]octa-2,5-dien-7-yl)octanoic acid (inseparable mixture of tautomers **2a** and **2b**)

<sup>1</sup>H p 2

8-(2,5-Di(pyridin-2-yl)-3,4-diazabicyclo[4.2.0]octa-1,3,5-trien-7-yl)octanoic acid (**3**)

<sup>1</sup>H 3

<sup>13</sup>C 4

#### Construction of CbK

((Pent-4-en-1-yloxy)methyl)benzene (**4**).

<sup>1</sup>H 5

<sup>13</sup>C 6

*cis*-3-(3-(benzyloxy)propyl)-2,2-dichlorocyclobutan-1-ol (**5**)

<sup>1</sup>H 7

<sup>13</sup>C 8

*cis*-3-(3-(Benzyloxy)propyl)-2,2-dichlorocyclobutyl methanesulfonate (**6**)

<sup>1</sup>H 9

<sup>13</sup>C 10

3-(Cyclobut-2-en-1-yl)propanol (unnumbered; not isolated)

<sup>1</sup>H 11

<sup>13</sup>C 12

3-(Cyclobut-2-en-1-yl)propanoic acid (**7**)

<sup>1</sup>H 13

<sup>13</sup>C 14

N6-(3-(Cyclobut-2-en-1-yl)propionyl)-L-lysine (**CbK**).

<sup>1</sup>H 15

<sup>13</sup>C 16

Model studies of inverse electron-demand Diels-Alder (IEDDA)

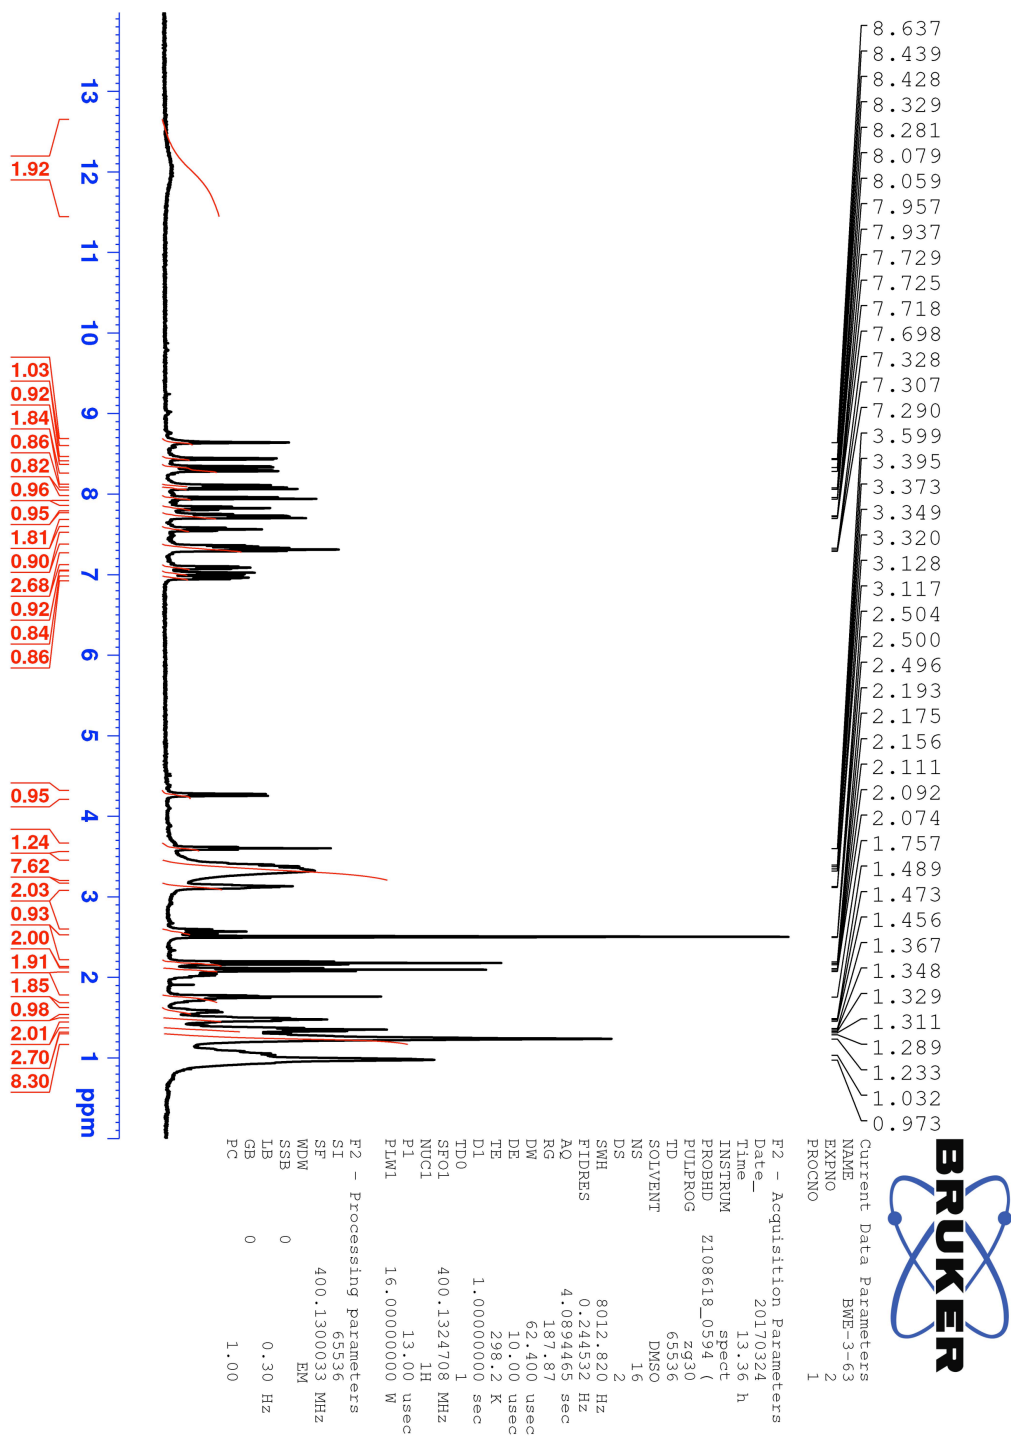

8-(2,5-Di(pyridin-2-yl)-3,4-diazabicyclo[4.2.0]octa-1,4-dien-7-yl)octanoic acid and -2,5-dien-7-yl tautomer. (2a, 2b)

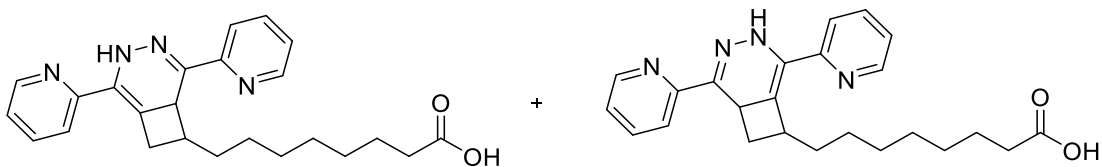

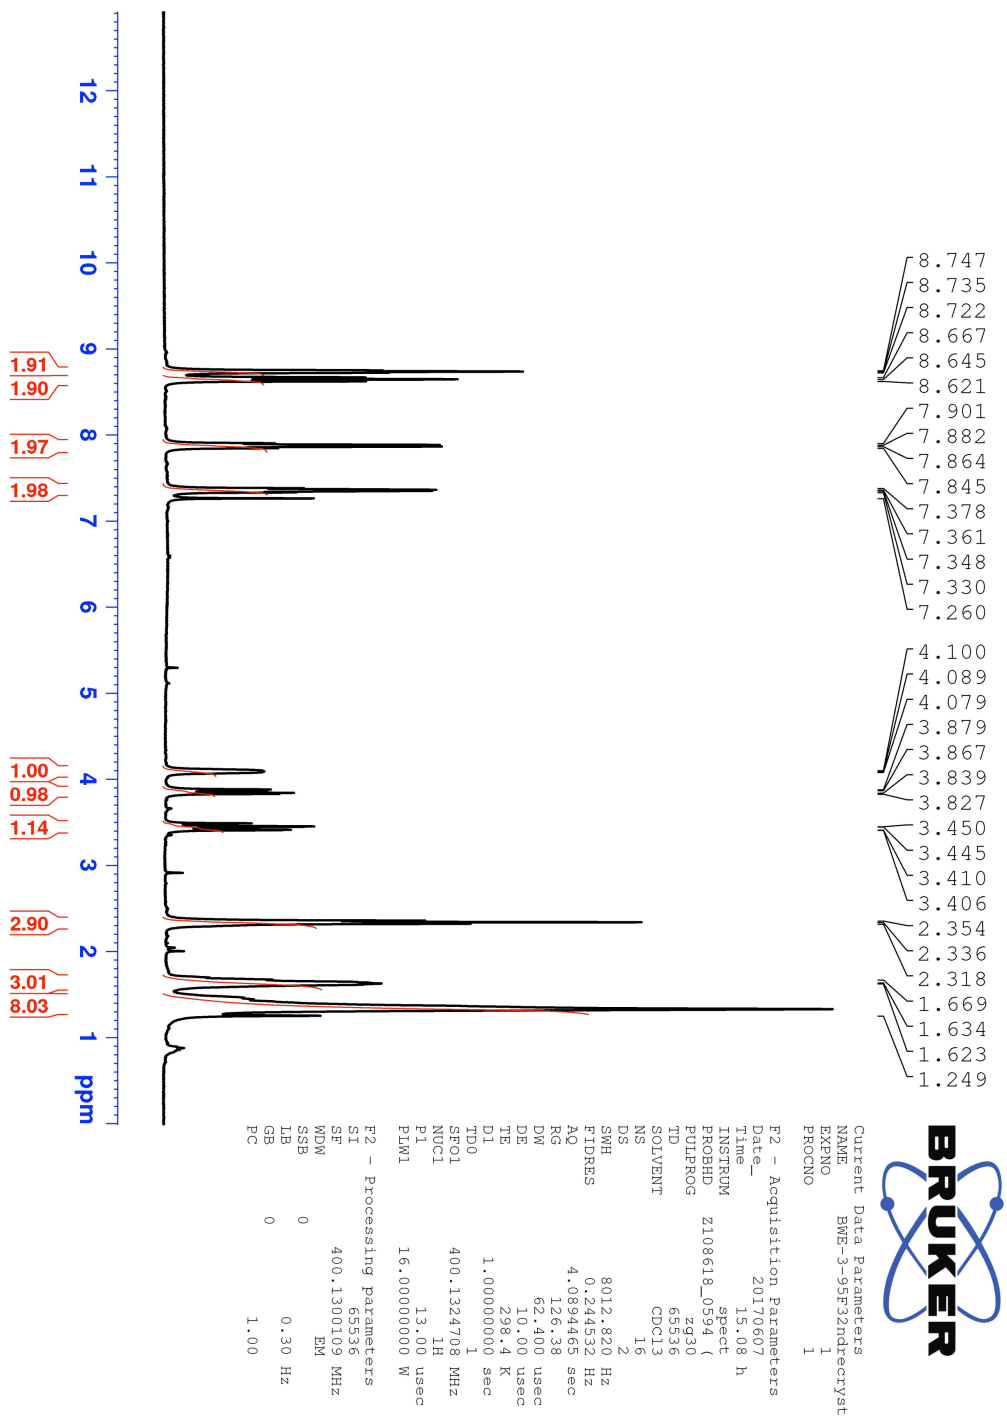

8-(2,5-Di(pyridin-2-yl)-3,4-diazabicyclo[4.2.0]octa-1,3,5-trien-7-yl)octanoic acid (one-pot cycloaddition/aromatization). <sup>1</sup>H spectrum

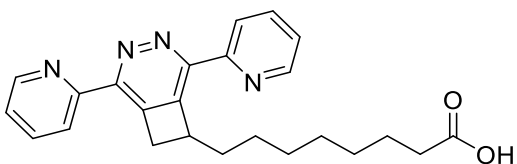

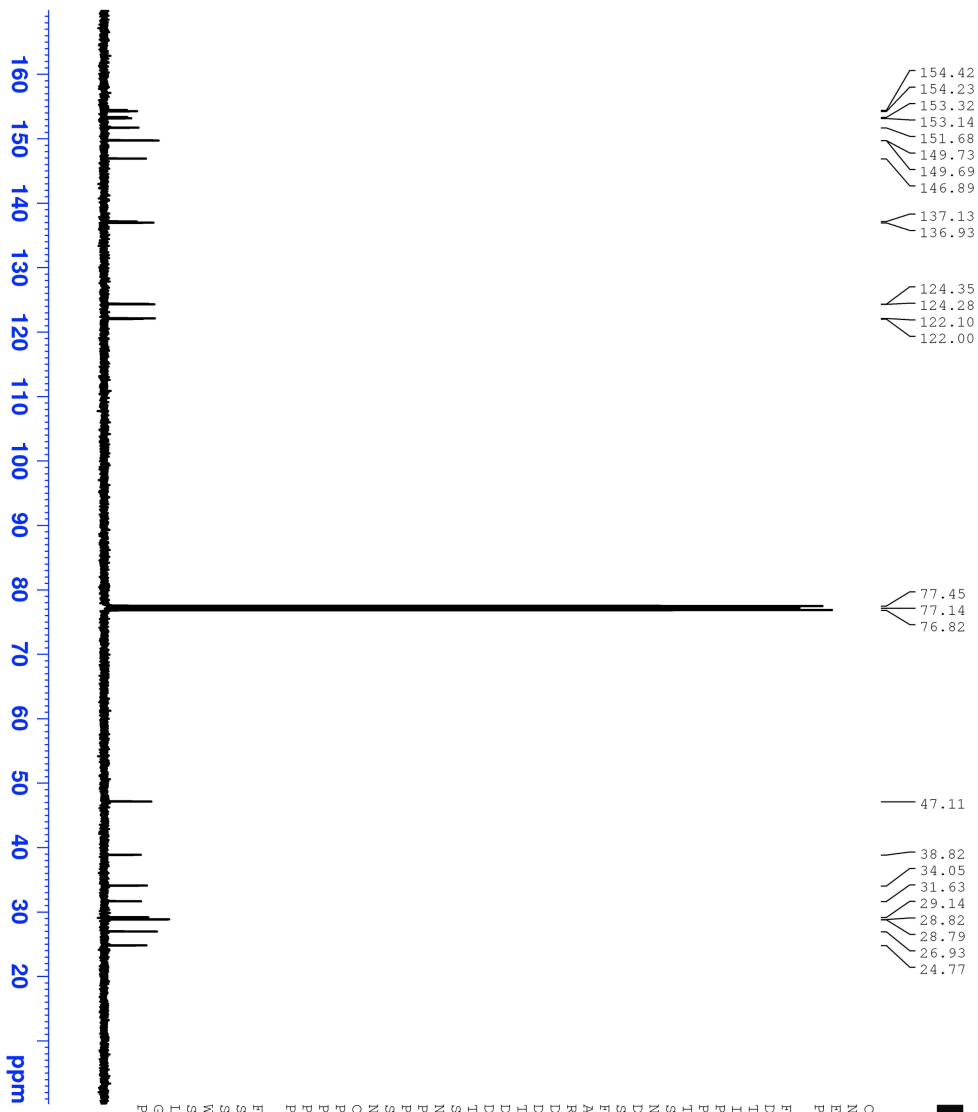

Current Data Parameters  
 NAME BME-3-95F3ndrecryst  
 EXPNO 21  
 PROCNO 1

F2 - Acquisition Parameters  
 Date\_ 20170608  
 Time 8.57 h  
 INSTRUM spect  
 PROBHD Z108618\_0594 (zgrg30)  
 PULPROG zgpg30  
 TD 65536  
 SOLVENT CDCl3  
 NS 503  
 DS 4  
 SWH 24038.461 Hz  
 FIDRES 0.733596 Hz  
 AQ 1.3631488 sec  
 RG 210.59  
 DW 20.800 usec  
 DE 10.00 usec  
 TE 298.1 K  
 D1 10.00000000 sec  
 D11 0.03000000 sec  
 TD0 1  
 SF01 100.628233 MHz  
 NUC1 13C  
 P1 9.00 usec  
 P1M1 58.00000000 W  
 SF02 400.1316005 MHz  
 NUC2 1H  
 P2 16.00000000 W  
 PLW2 0.2844001 W  
 PLWI2 0.14307000 W  
 PLWI3 0.14307000 W

F2 - Processing parameters  
 SI 32768  
 SF 100.6127578 MHz  
 WDW EM  
 SSB 0 Hz  
 LB 0  
 GB 0  
 PC 1.40

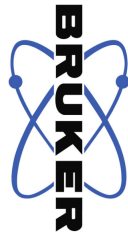

8-(2,5-Di(pyridin-2-yl)-3,4-diazabicyclo[4.2.0]octa-1,3,5-trien-7-yl)octanoic acid (one-pot cycloaddition/aromatization). <sup>1</sup>H spectrum

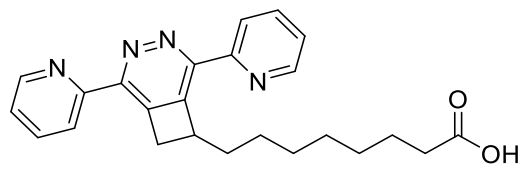



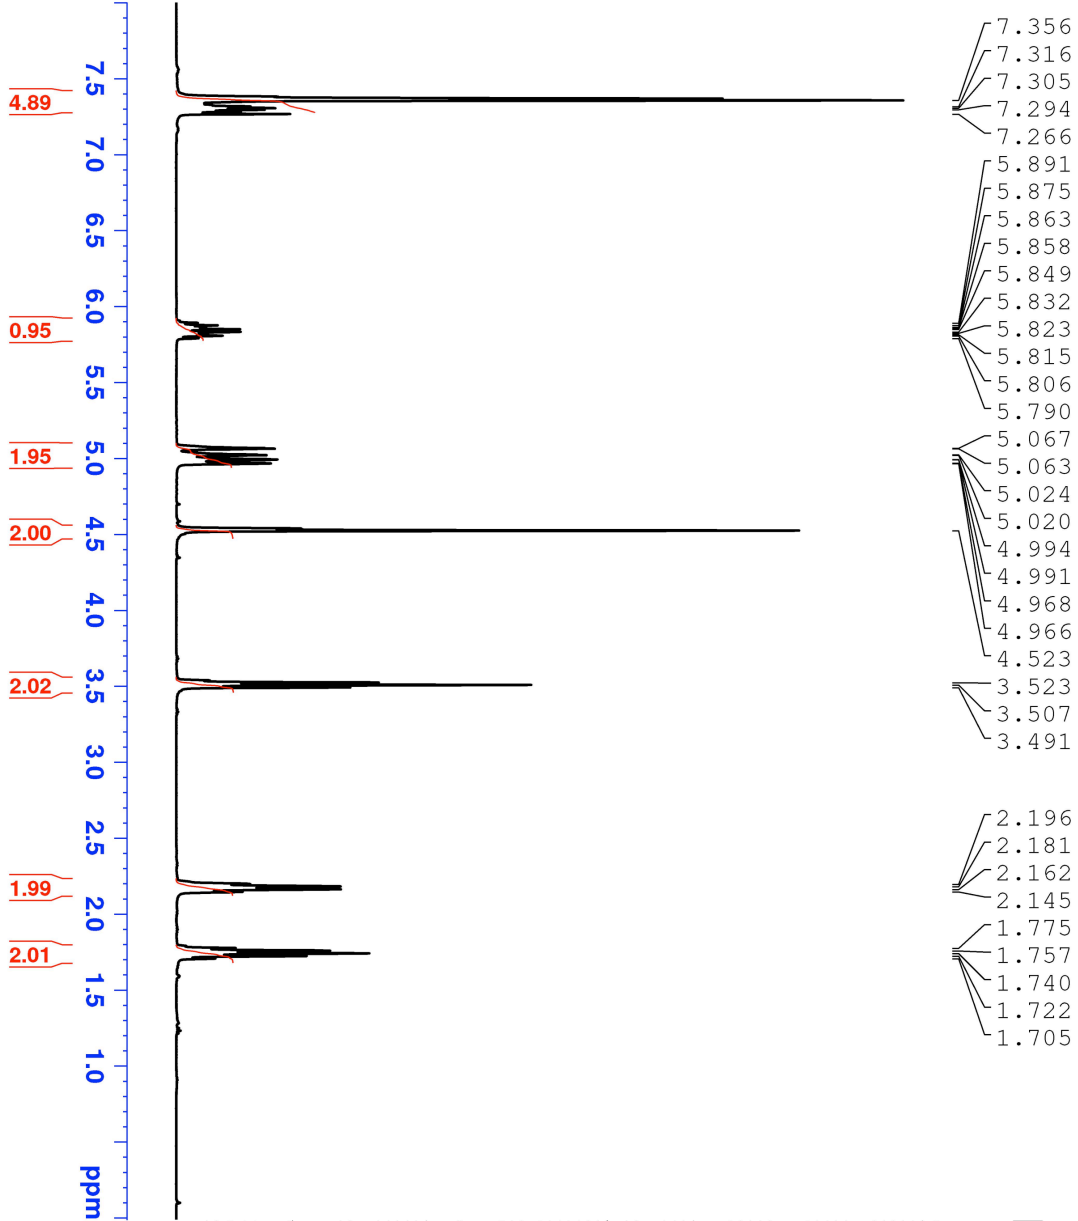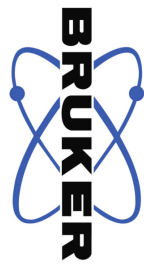

Current Data Parameters  
 NAME BDE-7-66-pdt  
 EXPNO 1  
 PROCNO 1

F2 - Acquisition Parameters  
 Date\_ 20160218  
 Time 9.23

INSTRUM spect  
 PROBHD 5 mm PABBO BB/  
 PULPROG zg30  
 TD 65536  
 SOLVENT CDCl3  
 NS 8  
 DS 2

SWH 8012.820 Hz  
 FIDRES 0.122266 Hz  
 AQ 4.0894465 sec  
 RG 62.76  
 DW 62.400 usec  
 DE 10.00 usec  
 TE 298.1 K  
 D1 1.00000000 sec  
 TDO 1

==== CHANNEL f1 =====  
 SF01 400.1324710 MHz  
 NUCL1 1H  
 P1 12.00 usec  
 PLW1 16.00000000 W

F2 - Processing parameters  
 SI 65536  
 SF 400.1300072 MHz  
 WDM EM  
 SSB 0  
 LB 0.30 Hz  
 GB 0  
 PC 1.00

((Pent-4-en-1-yloxy)methyl)benzene (1). <sup>1</sup>H spectrum.

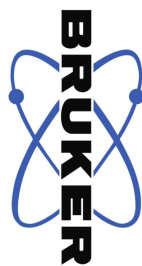

Current Data Parameters  
NAME BDE-7-66-Carbon  
EXPNO 1  
PROCNO 1

F2 - Acquisition Parameters  
Date\_ 20160218  
Time 9.33

INSTRUM spect  
PROBHD 5 mm PABBO BB/  
PULPROG zgpg30  
TD 65536  
SOLVENT CDCl3  
NS 107  
DS 4

SWH 24038.461 Hz  
FIDRES 0.366798 Hz  
AQ 1.3631488 sec

RG 210.59  
DW 20.800 usec  
DE 10.00 usec  
TE 298.2 K  
D1 2.00000000 sec  
D11 0.03000000 sec  
TD0 1

==== CHANNEL f1 =====  
SFO1 100.6228293 MHz  
NUC1 13C  
P1 9.00 usec  
PLW1 58.00000000 W

==== CHANNEL f2 =====  
SFO2 400.1316005 MHz  
NUC2 1H  
PCPD2 waitz16  
PLW2 90.00 usec  
PLM2 16.00000000 W  
PLM12 0.28444001 W  
PLM13 0.23040000 W

F2 - Processing parameters  
SI 32768  
SF 100.6127578 MHz  
WDW EM  
SSB 0  
LB 1.00 Hz  
GB 0  
PC 1.40

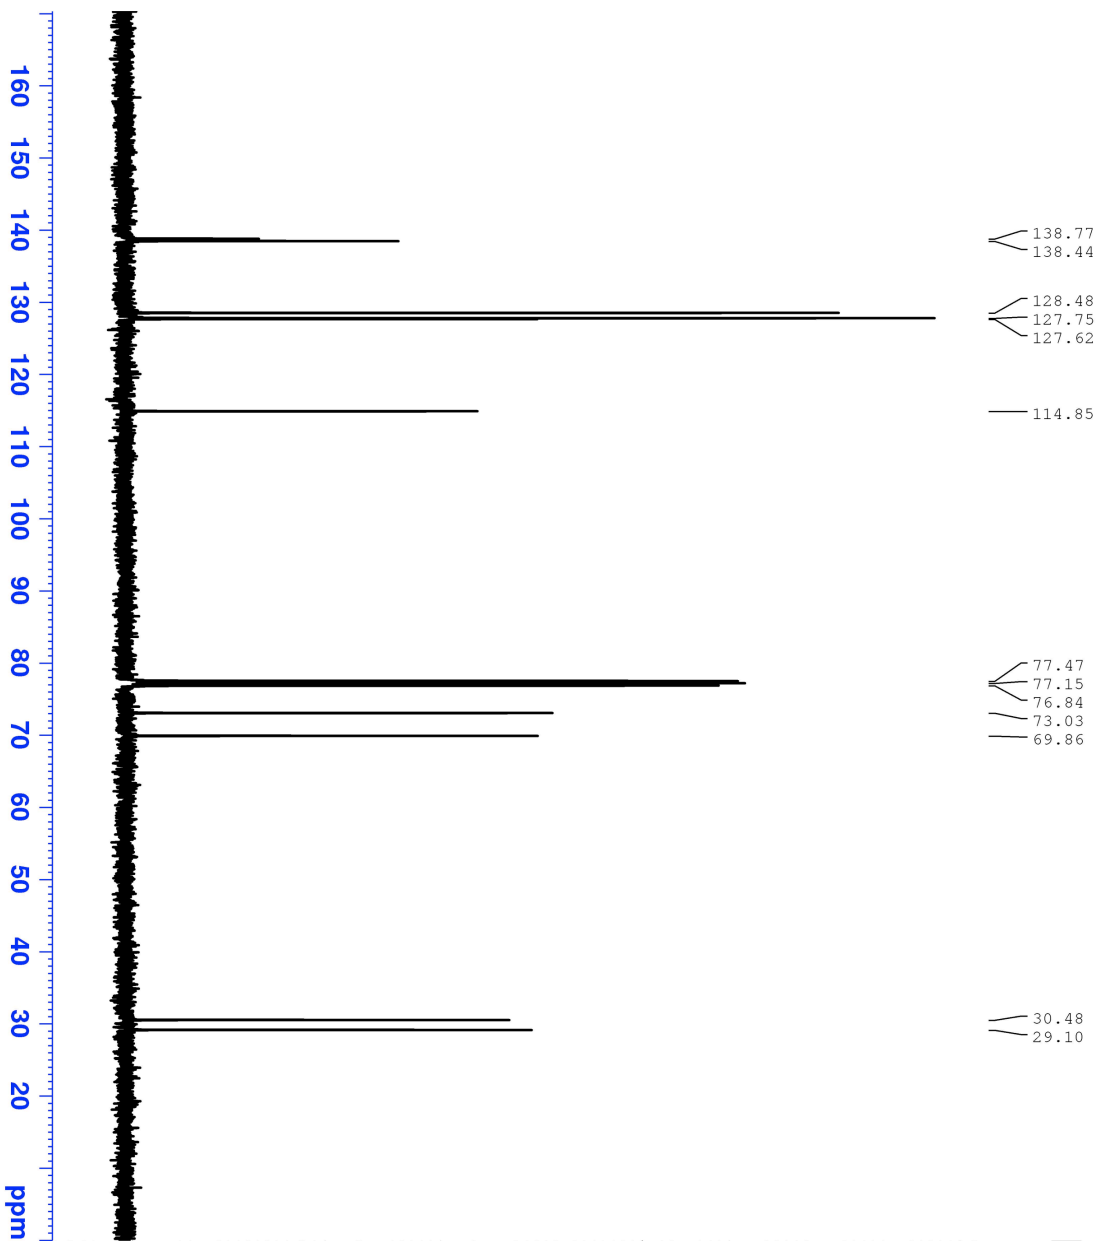

((Pent-4-en-1-yloxy)methyl)benzene (1). <sup>13</sup>C spectrum.

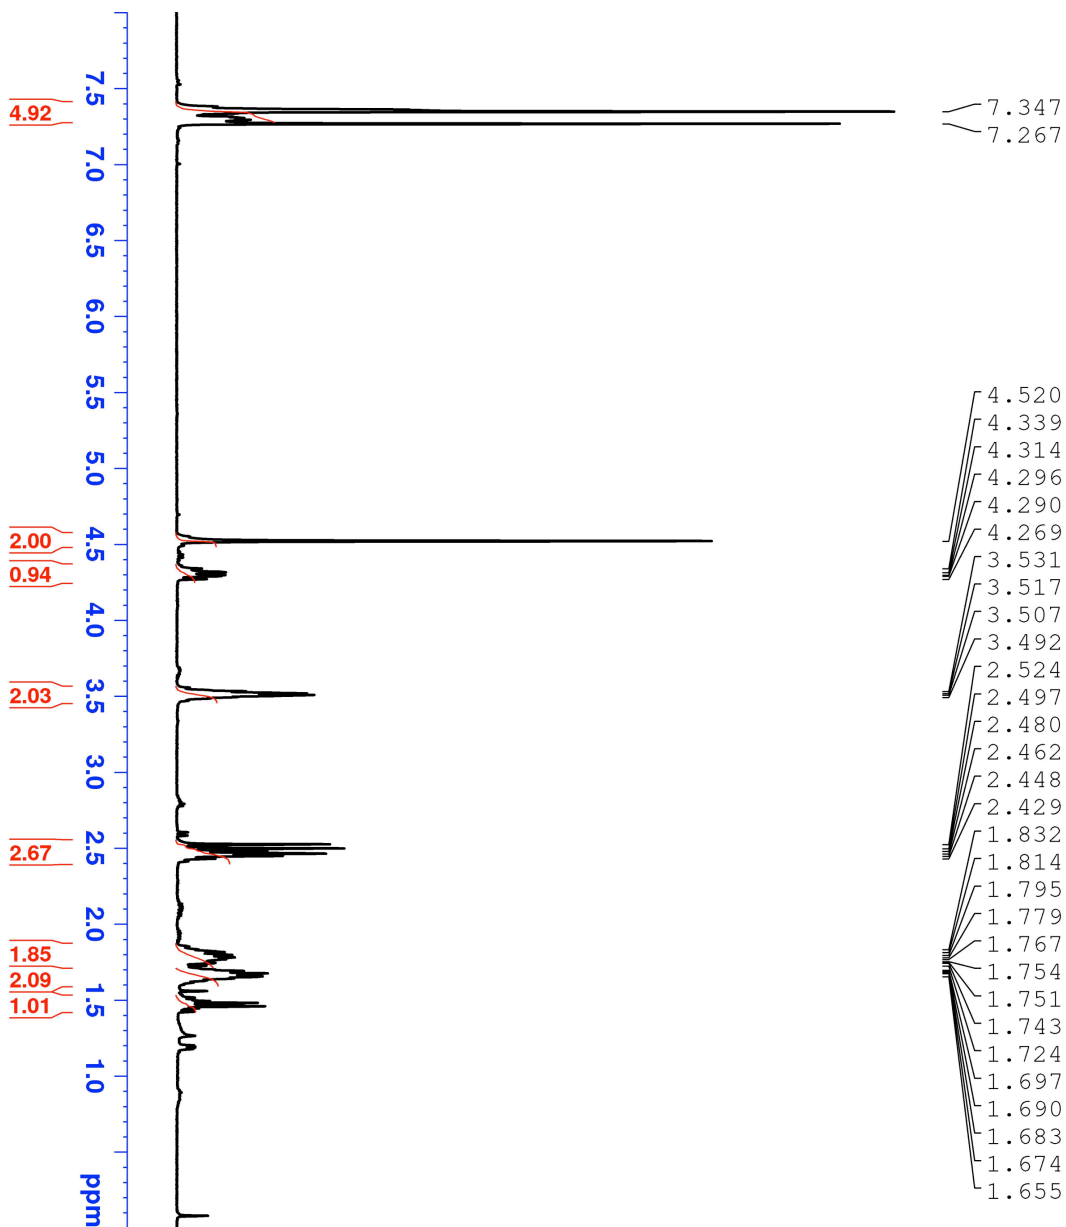

7.347  
7.267

4.520  
4.339  
4.314  
4.296  
4.290  
4.269  
3.531  
3.517  
3.507  
3.492  
2.524  
2.497  
2.480  
2.462  
2.448  
2.429  
1.832  
1.814  
1.795  
1.779  
1.767  
1.754  
1.751  
1.743  
1.724  
1.697  
1.690  
1.683  
1.674  
1.655

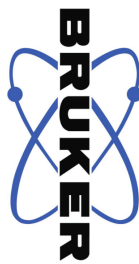

Current Data Parameters  
NAME BDE-7-77  
EXPNO 1  
PROCNO 1

F2 - Acquisition Parameters  
Date\_ 20160222  
Time 14.51  
INSTRUM spect  
PROBHD 5 mm PABBO BB/  
PULPROG zg30  
ID 65536  
SOLVENT CDCl3  
NS 10  
DS 2  
SWH 8012.820 Hz  
FIDRES 0.122266 Hz  
AQ 4.0894465 sec  
RG 210.59  
DW 62.400 usec  
DE 10.00 usec  
TE 298.2 K  
D1 1.00000000 sec  
TDO 1

==== CHANNEL f1 =====  
SFO1 400.1324710 MHz  
NUC1 1H  
PI 12.00 usec  
PLW1 16.00000000 W

F2 - Processing parameters  
SI 65536  
SF 400.1300070 MHz  
WDW EM  
SSB 0  
LB 0.30 Hz  
GB 0  
PC 1.00

*cis*-3-(3-(Benzyloxy)propyl)-2,2-dichlorocyclobutan-1-ol (2). <sup>1</sup>H spectrum.

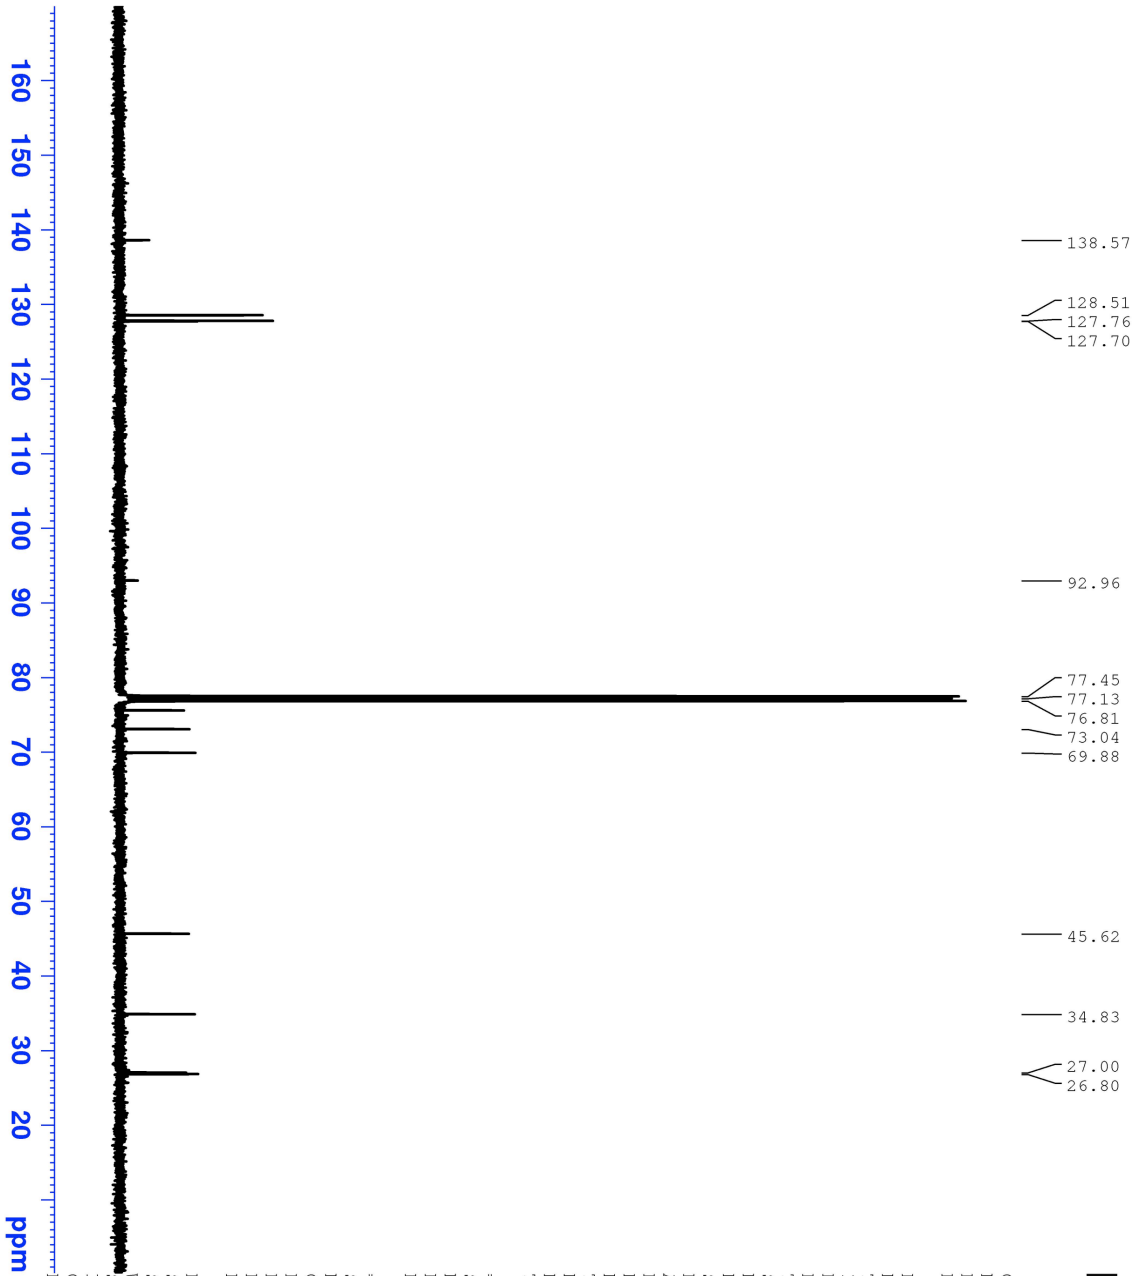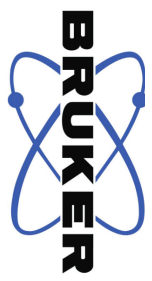

Current Data Parameters  
 NAME BDE-7-77-Carbon  
 EXPNO 1  
 PROCNO 1

F2 - Acquisition Parameters  
 Date\_ 20160222  
 Time 15.13

INSTRUM spect  
 PROBHD 5 mm PABBO BB/  
 PULPROG zgpg30  
 TD 65536  
 SOLVENT CDCl3  
 NS 296  
 DS 4

SWH 24038.461 Hz  
 FIDRES 0.366798 Hz  
 AQ 1.3631488 sec  
 RG 210.59  
 DW 20.800 usec  
 DE 10.00 usec  
 TE 298.2 K  
 D1 2.00000000 sec  
 D11 0.03000000 sec  
 TD0 1

==== CHANNEL f1 =====  
 SFO1 100.6228293 MHz  
 NUC1 13C  
 P1 9.00 usec  
 PLW1 58.00000000 W

==== CHANNEL f2 =====  
 SFO2 400.1316005 MHz  
 NUC2 1H  
 CPDPRG12 waltz16  
 PCPD2 90.00 usec  
 PLM2 16.00000000 W  
 PLM12 0.28444001 W  
 PLM13 0.23040000 W

F2 - Processing parameters  
 SI 32768  
 SF 100.6127578 MHz  
 WDW EM  
 SSB 0  
 GB 0  
 PC 1.40

*cis*-3-(3-(benzyloxy)propyl)-2,2-dichlorocyclobutan-1-ol (2). <sup>13</sup>C spectrum.

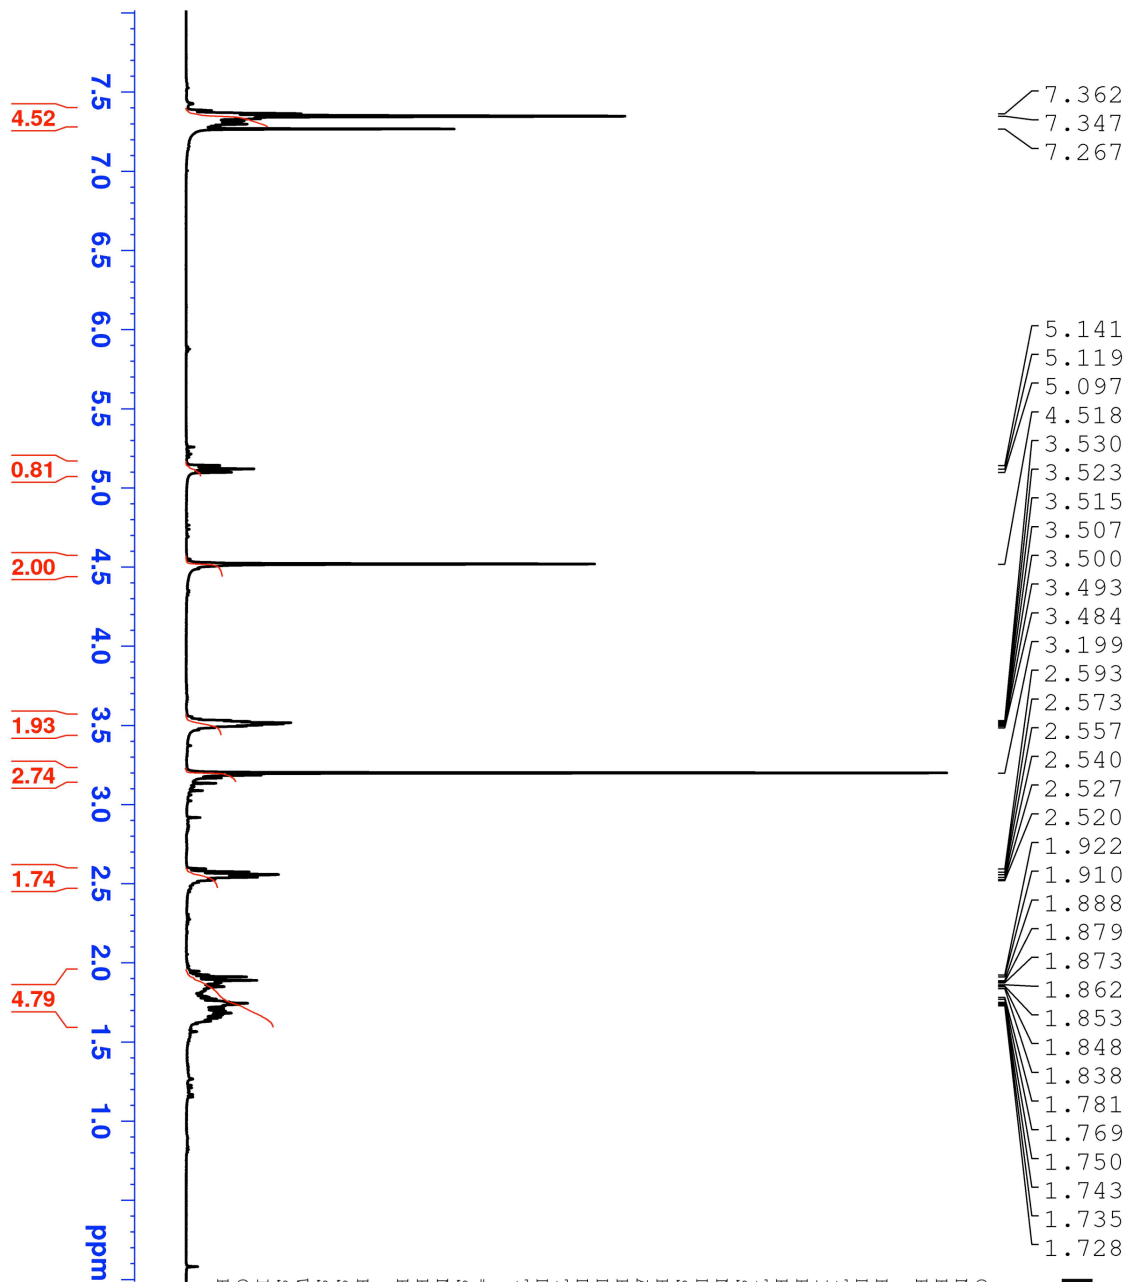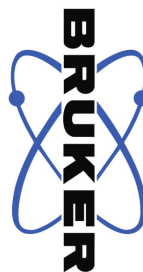

Current Data Parameters  
 NAME BDE-7-78  
 EXPNO 1  
 PROCNO 1

F2 - Acquisition Parameters

Date\_ 20160229  
 Time\_ 10.10  
 INSTRUM spect  
 PROBHD 5 mm PABBO BB/  
 PULPROG zg30  
 TD 65536  
 SOLVENT CDCl3  
 NS 16  
 DS 2  
 SWH 8012.820 Hz  
 FIDRES 0.122266 Hz  
 AQ 4.0894465 sec  
 RG 103.57  
 DW 62.400 usec  
 DE 10.00 usec  
 TE 298.1 K  
 D1 1.00000000 sec  
 TDO 1

===== CHANNEL f1 =====  
 SFO1 400.1324710 MHz  
 NUC1 1H  
 P1 12.00 usec  
 P1M1 16.00000000 W

F2 - Processing parameters  
 SI 65536  
 SF 400.1300072 MHz  
 WDW EM  
 SSB 0  
 LB 0.30 Hz  
 GB 0  
 PC 1.00

*cis*-3-(3-(Benzyloxy)propyl)-2,2-dichlorocyclobutyl methanesulfonate (3). <sup>1</sup>H spectrum.

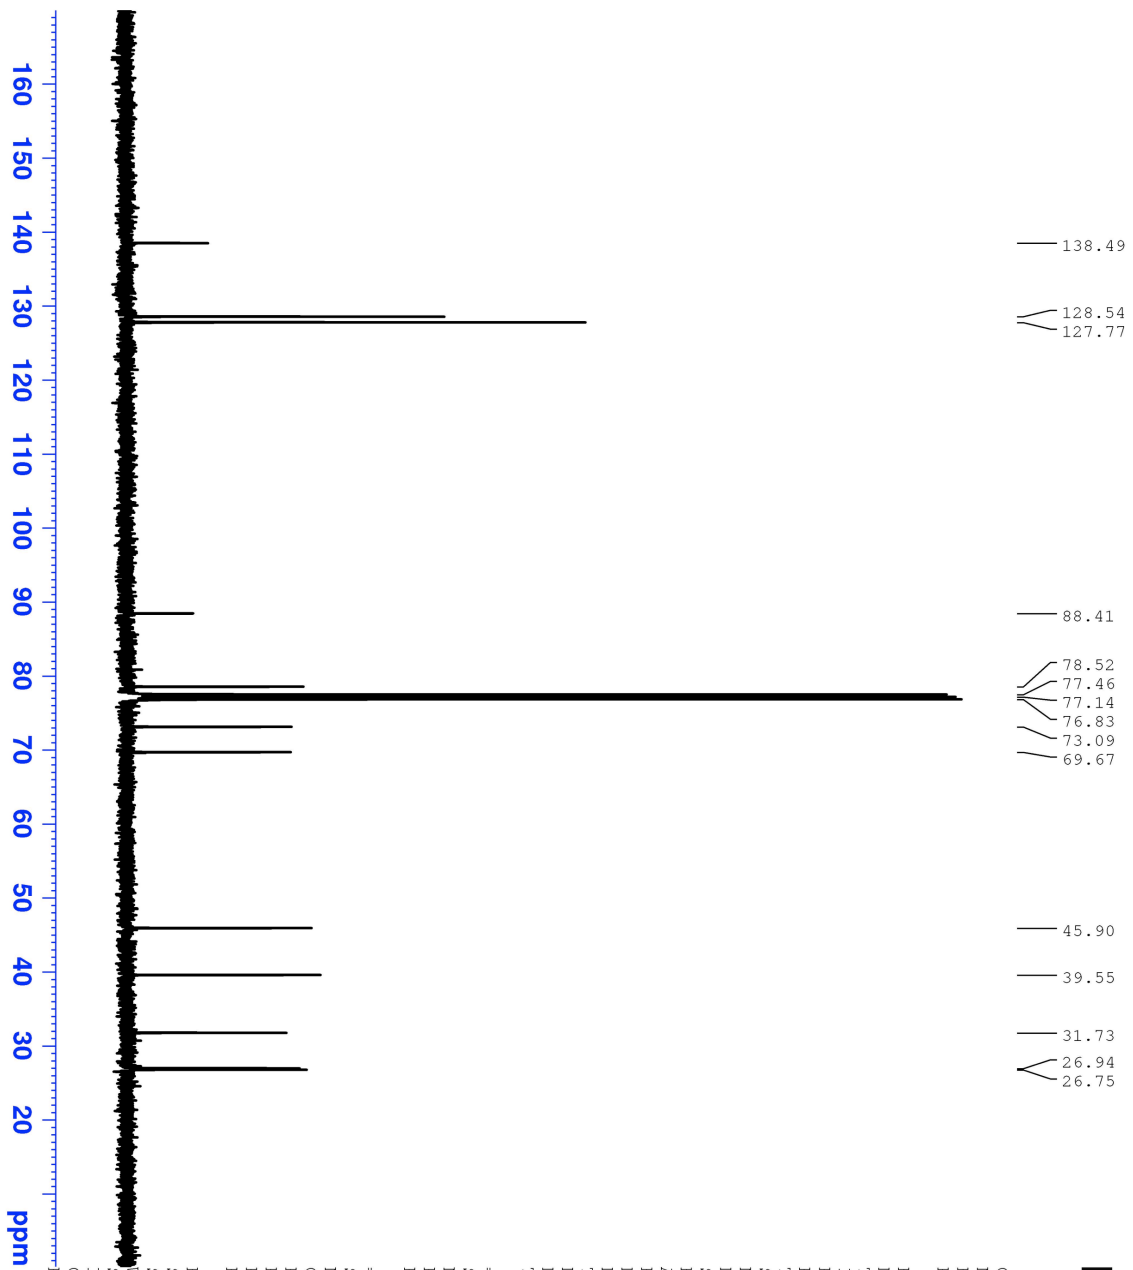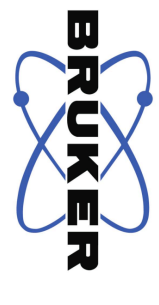

Current Data Parameters  
 NAME BDE-7-78-Carbon  
 EXPNO 1  
 PROCNO 1

F2 - Acquisition Parameters

Date\_ 20160229  
 Time 10.31  
 INSTRUM spect  
 PROBHD 5 mm PABBO BB/  
 PULPROG zgpg30  
 TD 65536  
 SOLVENT CDCl3  
 NS 205  
 DS 4  
 SWH 24038.461 Hz  
 FIDRES 0.366798 Hz  
 AQ 1.3631488 sec  
 RG 210.59  
 DW 20.800 usec  
 DE 10.00 usec  
 TE 298.2 K  
 D1 2.00000000 sec  
 D11 0.03000000 sec  
 TD0 1

==== CHANNEL f1 =====

SFO1 100.6228293 MHz  
 NUC1 13C  
 P1 9.00 usec  
 PLW1 58.00000000 W

==== CHANNEL f2 =====

SFO2 400.1316005 MHz  
 NUC2 1H  
 CPDPRG12 waltz16  
 PCPD2 90.00 usec  
 PLM2 16.00000000 W  
 PLW2 0.28444001 W  
 PLW13 0.23040000 W

F2 - Processing parameters

SI 32768  
 SF 100.6127578 MHz  
 WDW EM  
 SSB 0  
 GB 0  
 PC 1.40

*cis*-3-(3-(Benzyloxy)propyl)-2,2-dichlorocyclobutyl methanesulfonate (3). <sup>13</sup>C spectrum.

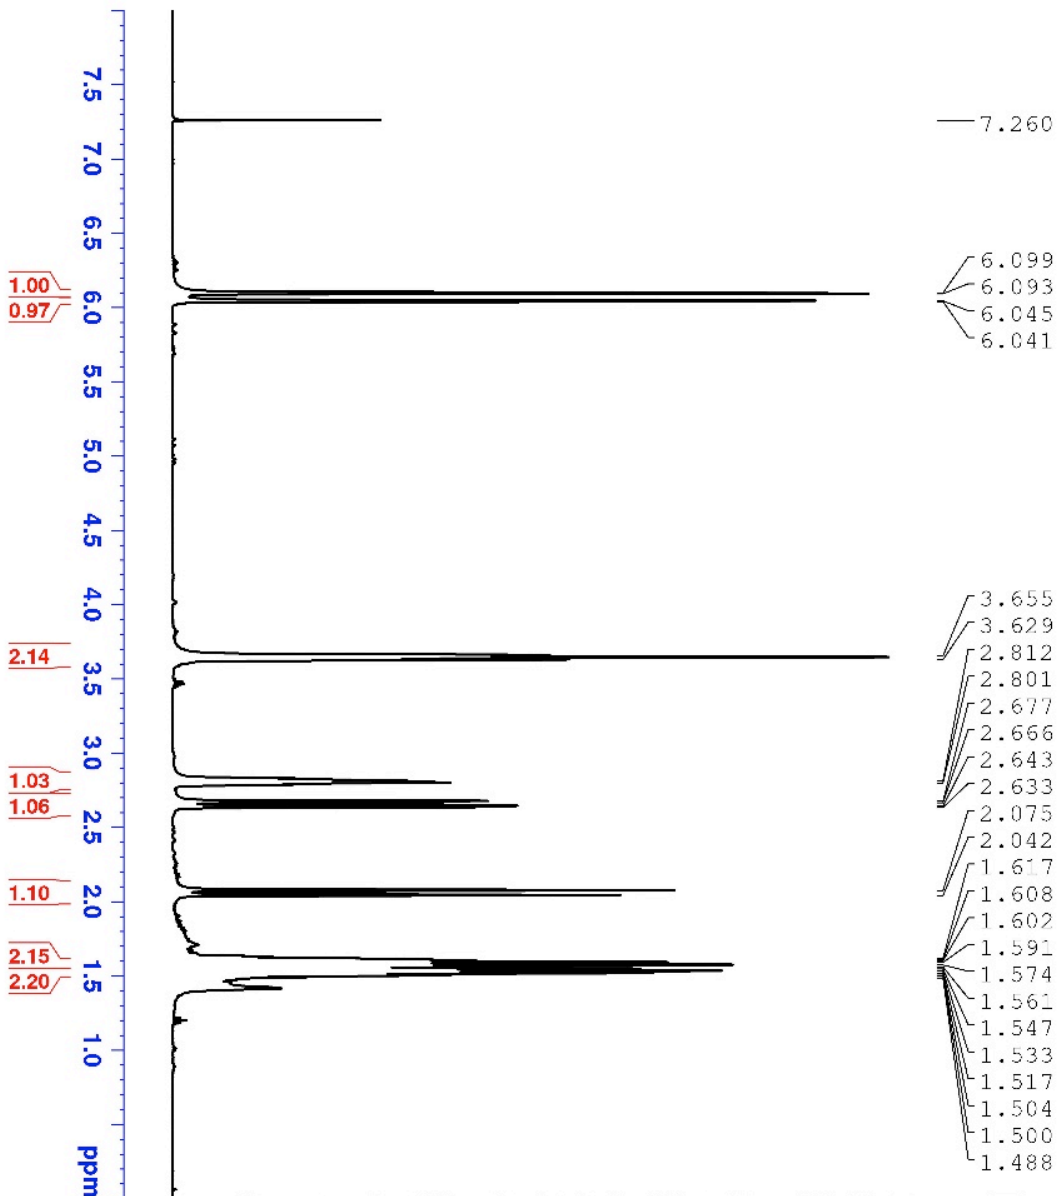

Current Data Parameters  
 NAME: BMR 4 59D  
 EXPNO: 7  
 ZPROGNO: 1

F2 - Acquisition Parameters  
 Date\_ 20170819  
 Time 21:15:16  
 INSTRUM spect  
 PROBU 2108618\_0394 (1  
 PULPROG zgpg30  
 TD 65536  
 SOLVENT CCO13  
 NS 16  
 DS 2  
 SWH 8012.920 Hz  
 FIDRES 0.244832 Hz  
 AQ 4.0894465 sec  
 RG 82.47  
 DK 62.400 usec  
 DE 10.00 usec  
 JE 298.0 K  
 DL 1.000000000 sec  
 DQ 1  
 SECT 400.1324798 MHz  
 NUC1 1H  
 P1 13.00 usec  
 P1M 16.000000000 W  
 P1M1

F2 Processing parameters  
 S 65536  
 SF 400.1300092 MHz  
 KDW 64  
 DR 0  
 CR 0  
 PC 1.00

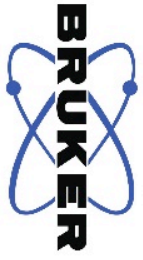

3-(Cyclobut-2-en-1-yl)propanol. <sup>1</sup>H spectrum of partially purified reaction aliquot.

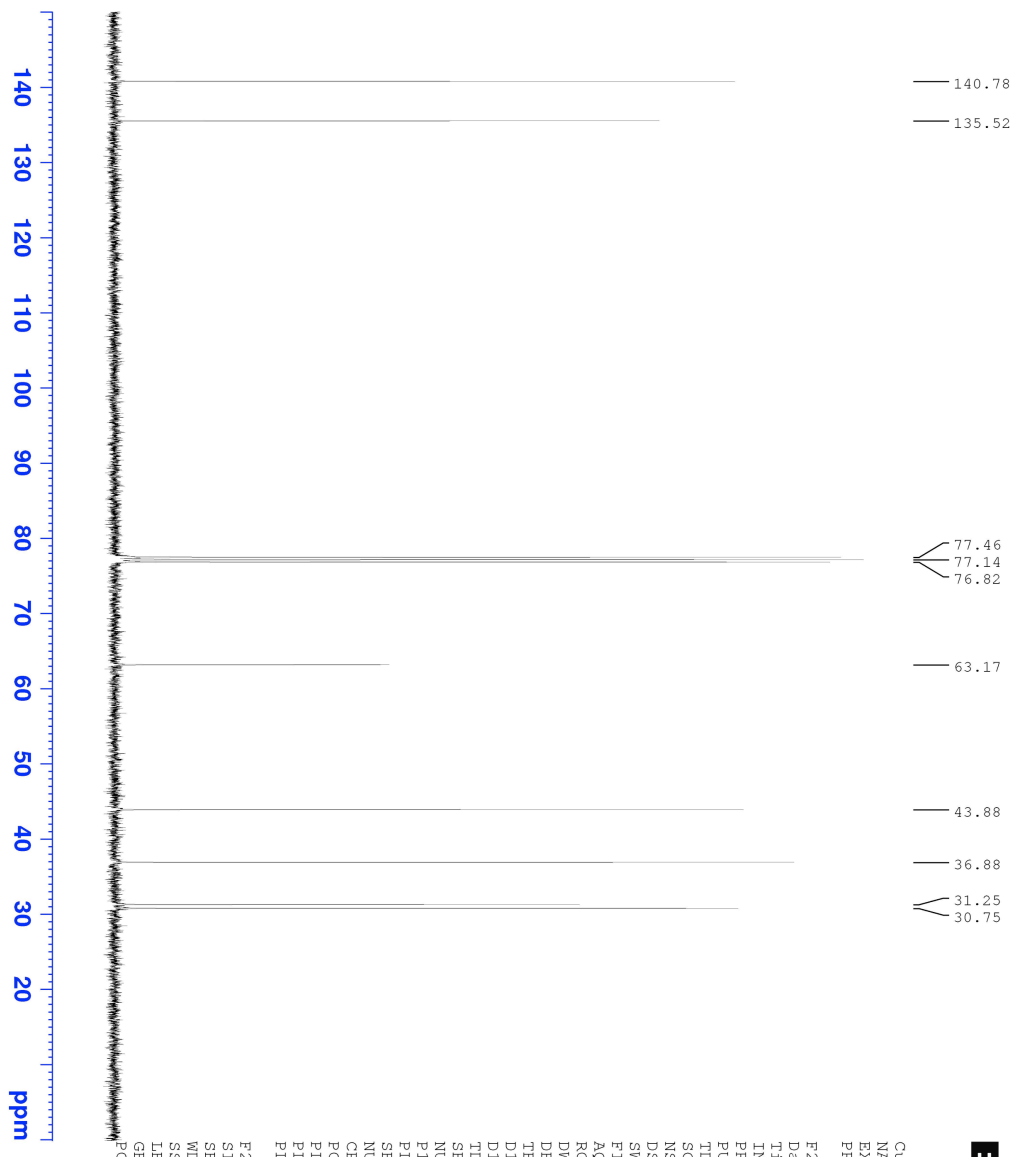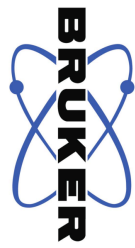

Current Data Parameters  
 NAME BME-4-59D1  
 EXPNO 10  
 PROCNO 1

F2 - Acquisition Parameters  
 Date\_ 20170819  
 Time 21.33 h  
 INSTRUM spect  
 PROBHD z108618\_0594 /  
 PULPROG zgpg30  
 TD 65536  
 SOLVENT CDCl3  
 NS 288  
 DS 4

SWH 24038.461 Hz  
 FIDRES 0.733596 Hz  
 AQ 1.3631488 sec  
 RG 210.59  
 DW 20.800 usec  
 DE 10.00 usec  
 TE 298.0 K

D1 2.00000000 sec  
 D11 0.03000000 sec  
 TDO 1  
 SFO1 100.62828293 MHz  
 NUC1 13C  
 P1 9.00 usec  
 PL1 58.00000000 W  
 SFO2 400.1316005 MHz

NUC2 1H  
 CPDPRG12 waltz16  
 PCPD2 90.00 usec  
 PLW2 16.00000000 W  
 PLM12 0.28444001 W  
 PLM13 0.14307000 W

F2 - Processing parameters  
 SI 32768  
 SF 100.6127578 MHz  
 WDM EM  
 SSB 0  
 LB 1.00 Hz  
 GB 0  
 PC 1.40

3-(Cyclobut-2-en-1-yl)propanol; <sup>13</sup>C spectrum of partially purified reaction aliquot.



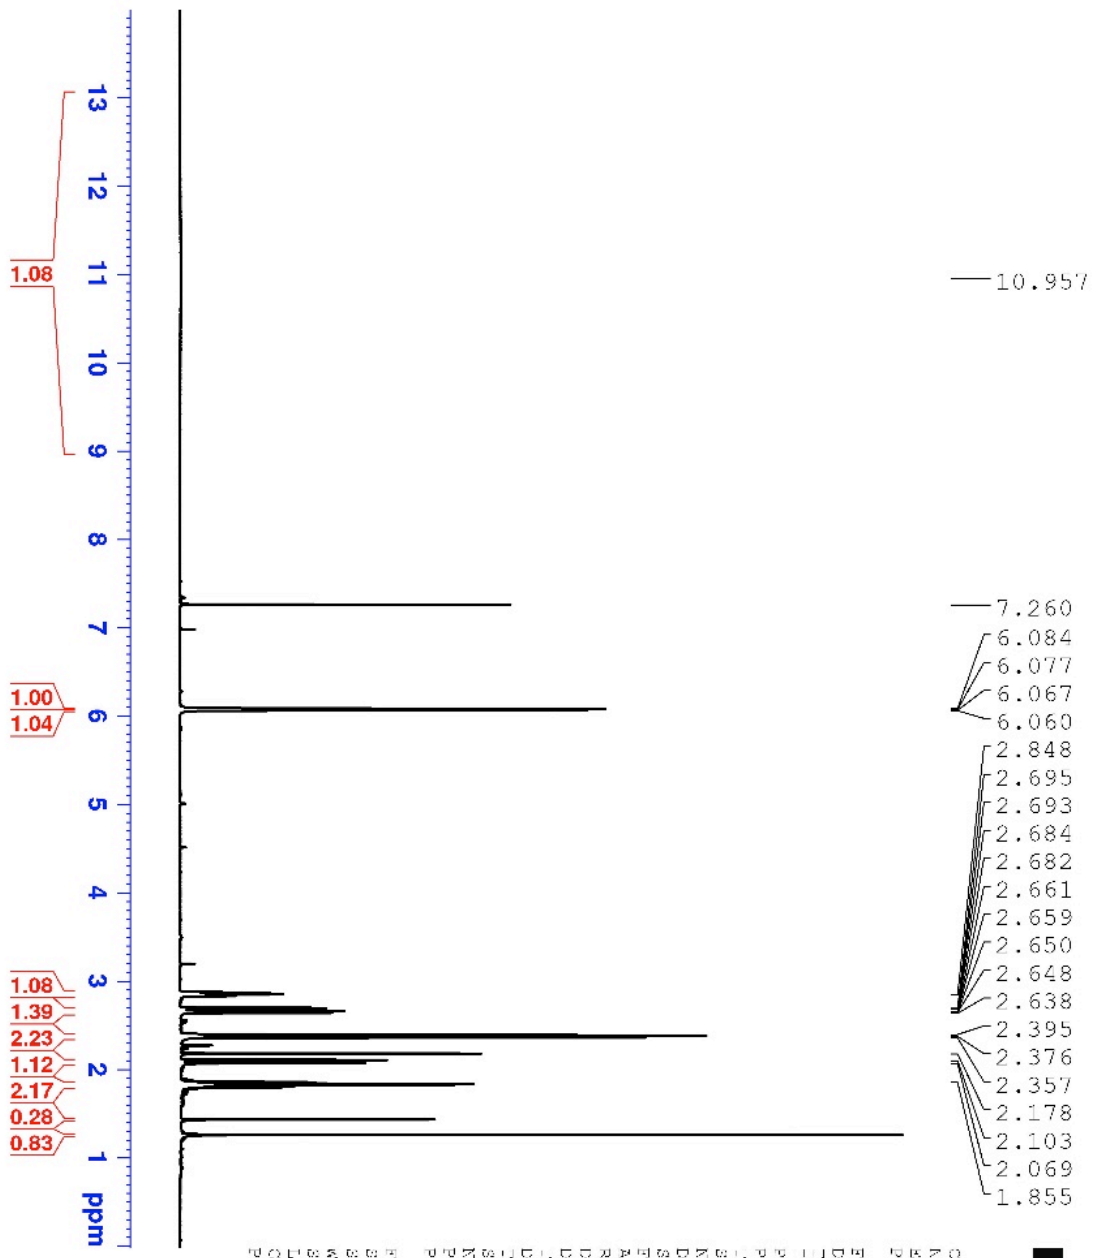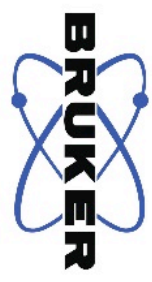

Current Data Parameters  
 NAME BMR 4 G2  
 EXPNO 6  
 PROCNO 1

F2 - Acquisition Parameters  
 Date\_ 20170820  
 Time 1:29 h

INSTRUM spect  
 PROBHD 5mm 1H  
 PULPROG zgpg30  
 ID 65536  
 SOLVENT CCl4  
 NS 16  
 DS 2

SM 8012.820 Hz  
 FIDRES 0.244532 Hz  
 AQ 4.0894455 sec  
 RG 187.87  
 DK 62.400 usec  
 DE 10.00 usec  
 DR 298.2 K  
 DL 1.00000000 sec

TD0 1  
 SF01 400.1324708 MHz  
 NUCL 1H  
 P1 13.00 usec  
 PL1 16.00000000 W

F2 Processing parameters  
 SI 65536  
 SR 400.1300000 MHz  
 MDW EM  
 SSB 0  
 LB 0.30 Hz  
 CB 0  
 PC 1.00

3-(Cyclobut-2-en-1-yl)propanoic acid (4). <sup>1</sup>H spectrum

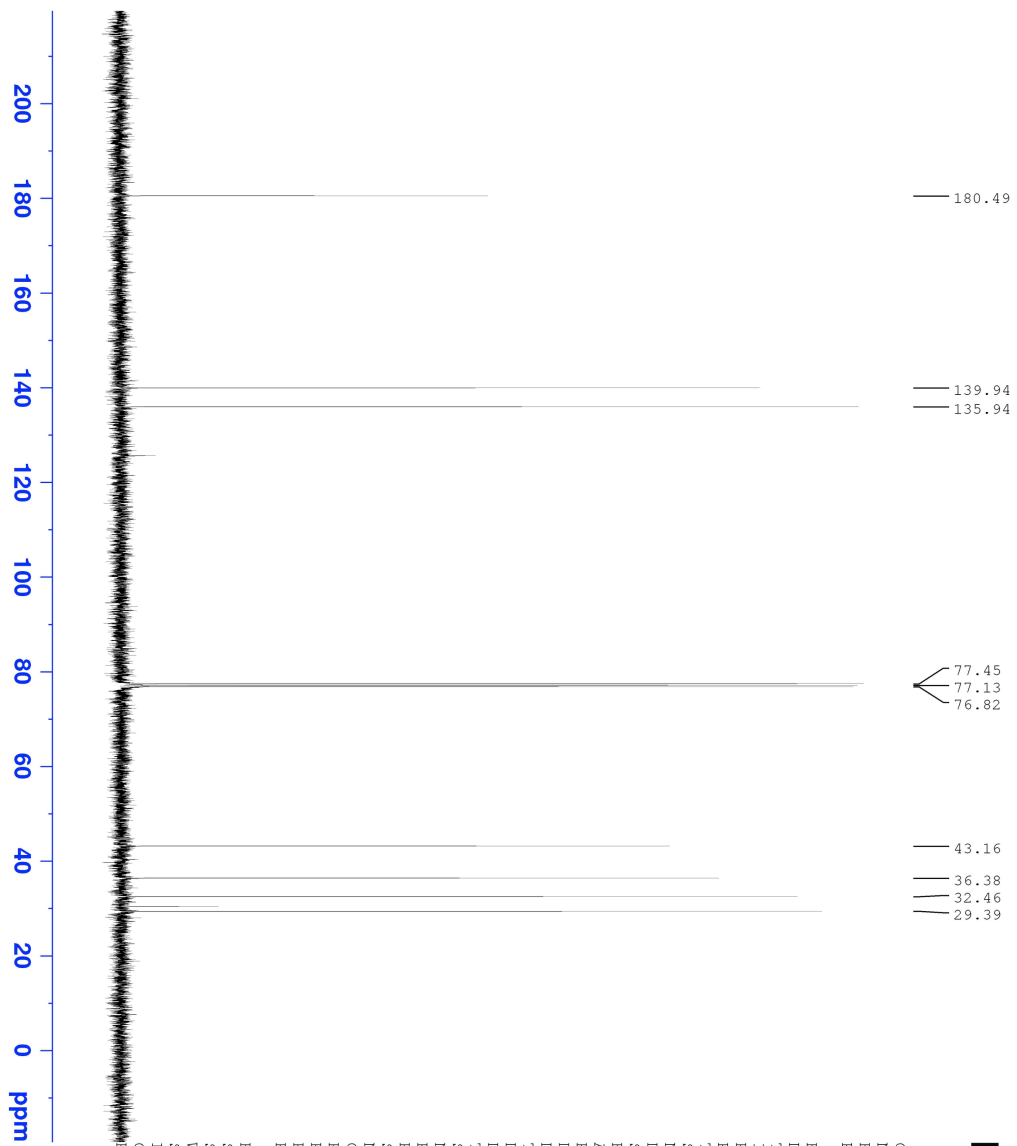

Current Data Parameters  
 NAME BME-4-62  
 EXPNO 3  
 PROCNO 1

F2 - Acquisition Parameters  
 Date\_ 20170821  
 Time 15.10 h  
 INSTRUM spect  
 PROBHD z108618\_0594 ( zggp30  
 PULPROG zgpg30  
 TD 65536  
 SOLVENT CDCl3  
 NS 43  
 DS 4  
 SWH 24038.461 Hz  
 FIDRES 0.733596 Hz  
 AQ 1.3631488 sec  
 RG 210.59  
 DM 20.800 usec  
 DE 10.00 usec  
 TE 298.0 K  
 D1 2.00000000 sec  
 D11 0.03000000 sec  
 TDO 1  
 SFO1 100.62828293 MHz  
 NUC1 13C  
 P1 9.00 usec  
 PL1 58.00000000 W  
 SFO2 400.1316005 MHz  
 NUC2 1H  
 CPDPRG[2] waltz16  
 PCPD2 90.00 usec  
 PLM2 15.00000000 W  
 PLM12 0.28444001 W  
 PLM13 0.14307000 W

F2 - Processing parameters  
 SI 32768  
 SF 100.6127578 MHz  
 WDM EM  
 SSB 0  
 IB 1.00 Hz  
 GB 0  
 PC 1.40

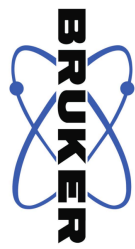

3-(Cyclobut-2-en-1-yl)propanoic acid (4). <sup>13</sup>C spectrum.

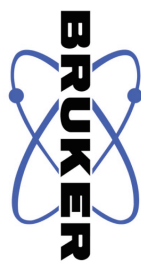

Current Data Parameters  
 NAME Klin-CbK-H-D2O-NaOH  
 EXPNO 1  
 PROCNO 1

F2 - Acquisition Parameters  
 Date\_ 20161123  
 Time 15.46  
 INSTRUM spect  
 PROBHD 5 mm PARBO BB/  
 PULPROG zgpg30  
 ID 32768  
 SOLVENT D2O  
 NS 4  
 DS 4  
 SWH 6393.862 Hz  
 FIDRES 0.195125 Hz  
 AQ 2.5624576 sec  
 RG 210.59  
 DW 78.200 usec  
 DE 10.00 usec  
 TE 298.1 K  
 D1 1.00000000 sec  
 D12 0.00020000 sec  
 D16 0.00020000 sec  
 TDO 1

==== CHANNEL f1 =====  
 SFO1 400.1318776 MHz  
 NUC1 1H  
 P1 13.00 usec  
 P2 26.00 usec  
 P12 2000.00 usec  
 PLW0 0 W  
 PLW1 16.00000000 W  
 SPVAM[1] Squa100.1000  
 SPOAL1 0.500  
 SPOFSL 0 Hz  
 SEW1 0.00270400 W

==== GRADIENT CHANNEL =====  
 GENVAM[1] SMSQ10.100  
 GENVAM[2] SMSQ10.100  
 GPZ1 31.00 %  
 GPZ2 11.00 %  
 Pl6 1000.00 usec

F2 - Processing parameters  
 SI 32768  
 SE 400.1300000 MHz  
 WDW EM  
 SSB 0  
 GB 0  
 PC 1.00

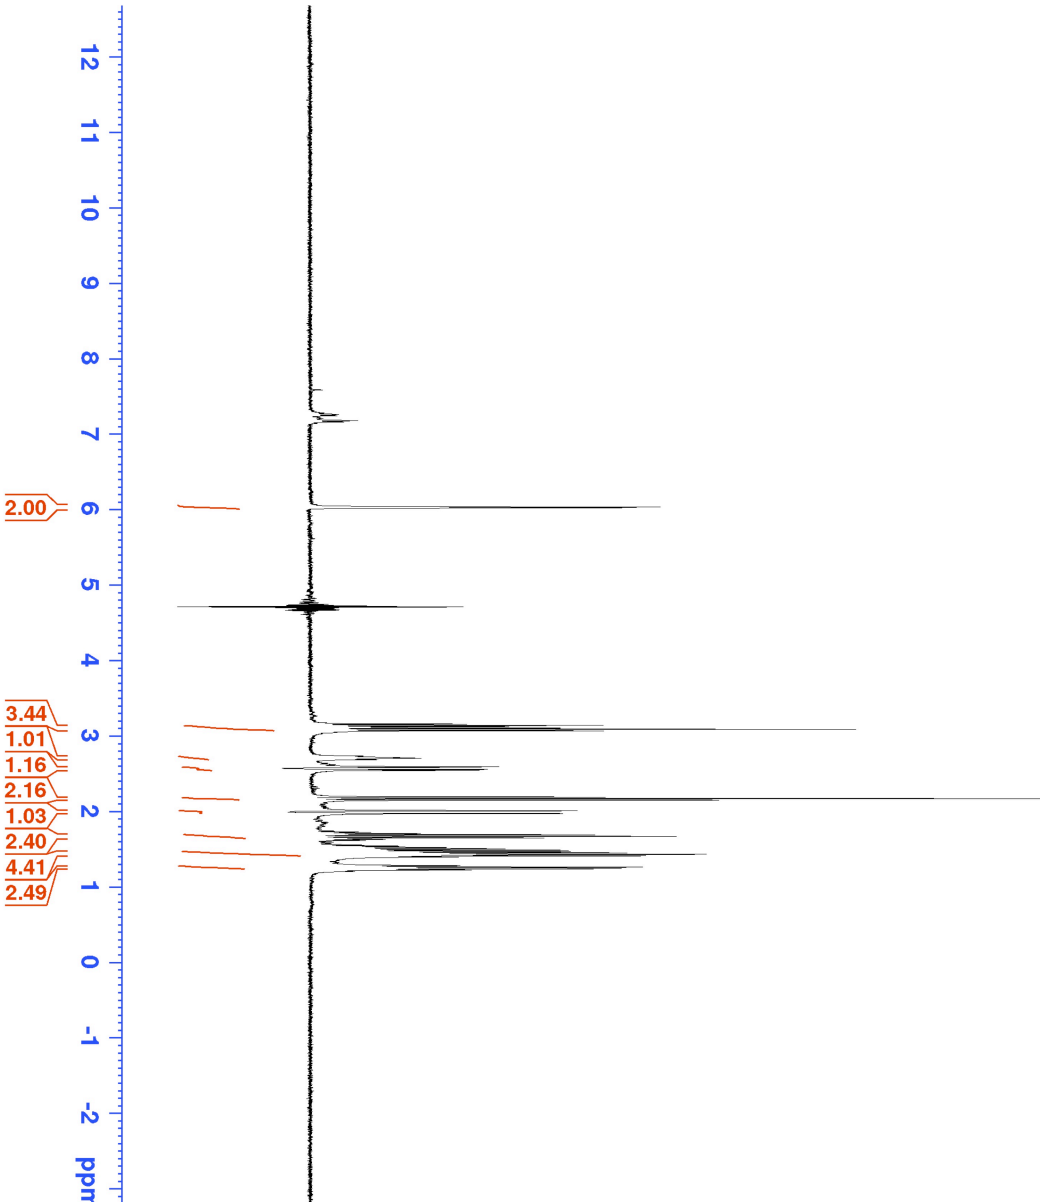

***N*<sub>6</sub>-(3-(Cyclobut-2-en-1-yl)propionyl)-L-lysine (CbK). <sup>1</sup>H spectrum**

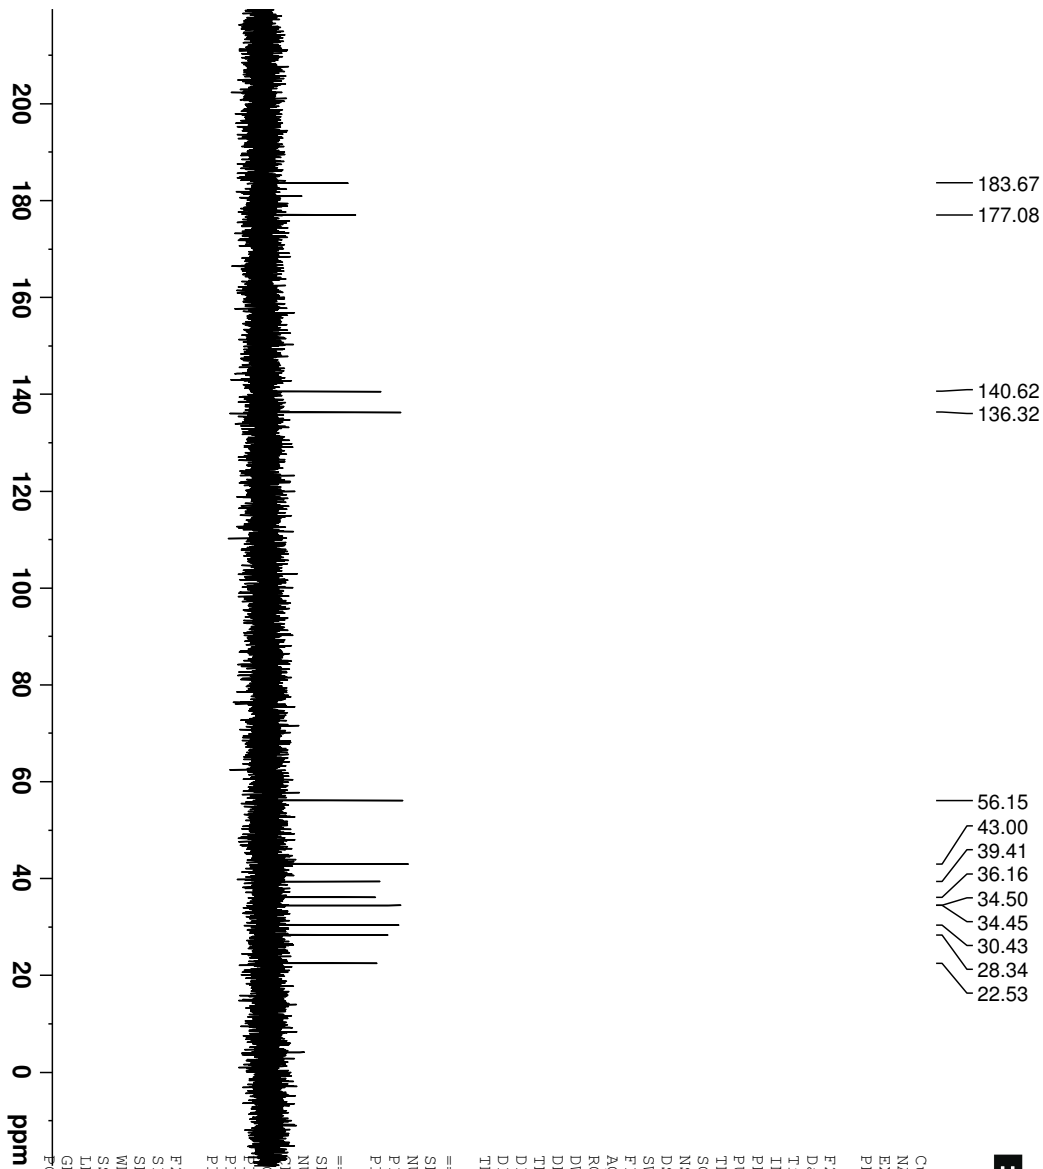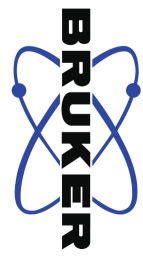

Current Data Parameters  
 NAME K11u-CbK-C--D2O--NaOH  
 EXPNO 1  
 PROCNO 1

F2 - Acquisition Parameters  
 Date\_ 20161123  
 Time 16.24

INSTRUM spect  
 PROBHD 5 mm PABBO BB/  
 PULPROG zgpg30  
 TD 65536  
 SOLVENT D2O  
 NS 589  
 DS 4

SWH 24038.461 Hz  
 FIDRES 0.366798 Hz  
 AQ 1.3631488 sec  
 RG 210.59  
 DW 20.800 usec  
 DE 10.00 usec  
 TE 298.2 K  
 D1 2.00000000 sec  
 D11 0.03000000 sec  
 TD0 1

==== CHANNEL f1 =====  
 SFO1 100.6228293 MHz  
 NUC1 13C  
 P1 9.00 usec  
 PLW1 58.00000000 W

==== CHANNEL f2 =====  
 SFO2 400.1316005 MHz  
 NUC2 1H  
 P2 16.00000000 W  
 PLW2 0.33383000 W  
 PLW12 0.27039999 W  
 PLW13 0.27039999 W

F2 - Processing parameters  
 SI 32768  
 SF 100.6127578 MHz  
 WDW EM  
 SSB 0  
 LB 1.00 Hz  
 GB 0  
 PC 1.40

$N_6$ -(3-(Cyclobut-2-en-1-yl)propionyl)-L-lysine (CbK).  $^{13}C$  spectrum
